# Supplementary material for: Quantitative determination of iron citrate/malate complexes by isotope–dilution hydrophilic interaction liquid chromatography – electrospray MS/inductively coupled plasma MS
Source: Royal Society of Chemistry journal article supplement (doi:10.1039/d2ja00164k), 2022-01-01
Supplement: d2ja00164k2.pdf [file d2ja00164k2.pdf]

## SUPPLEMENTARY INFORMATION

### Quantitative determination of iron citrate/malate complexes by isotope-dilution hydrophilic interaction liquid chromatography - electrospray MS/inductively coupled plasma MS.

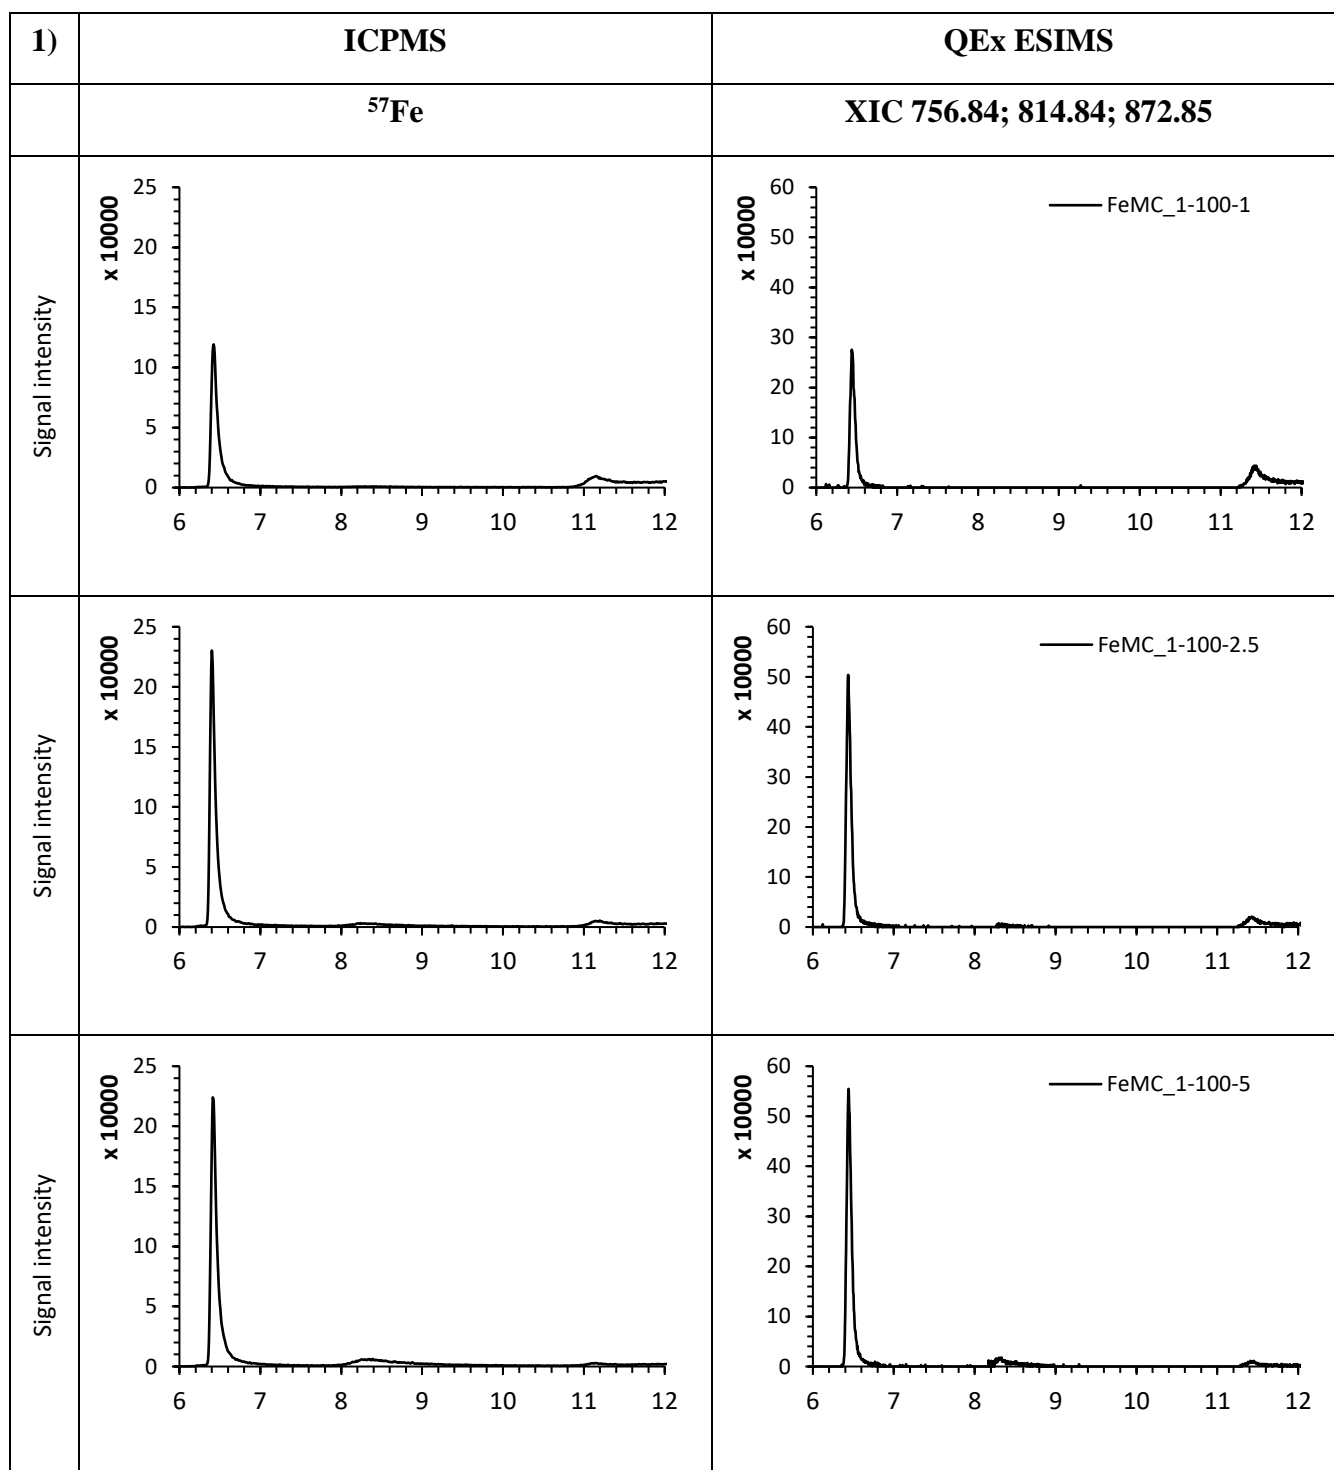

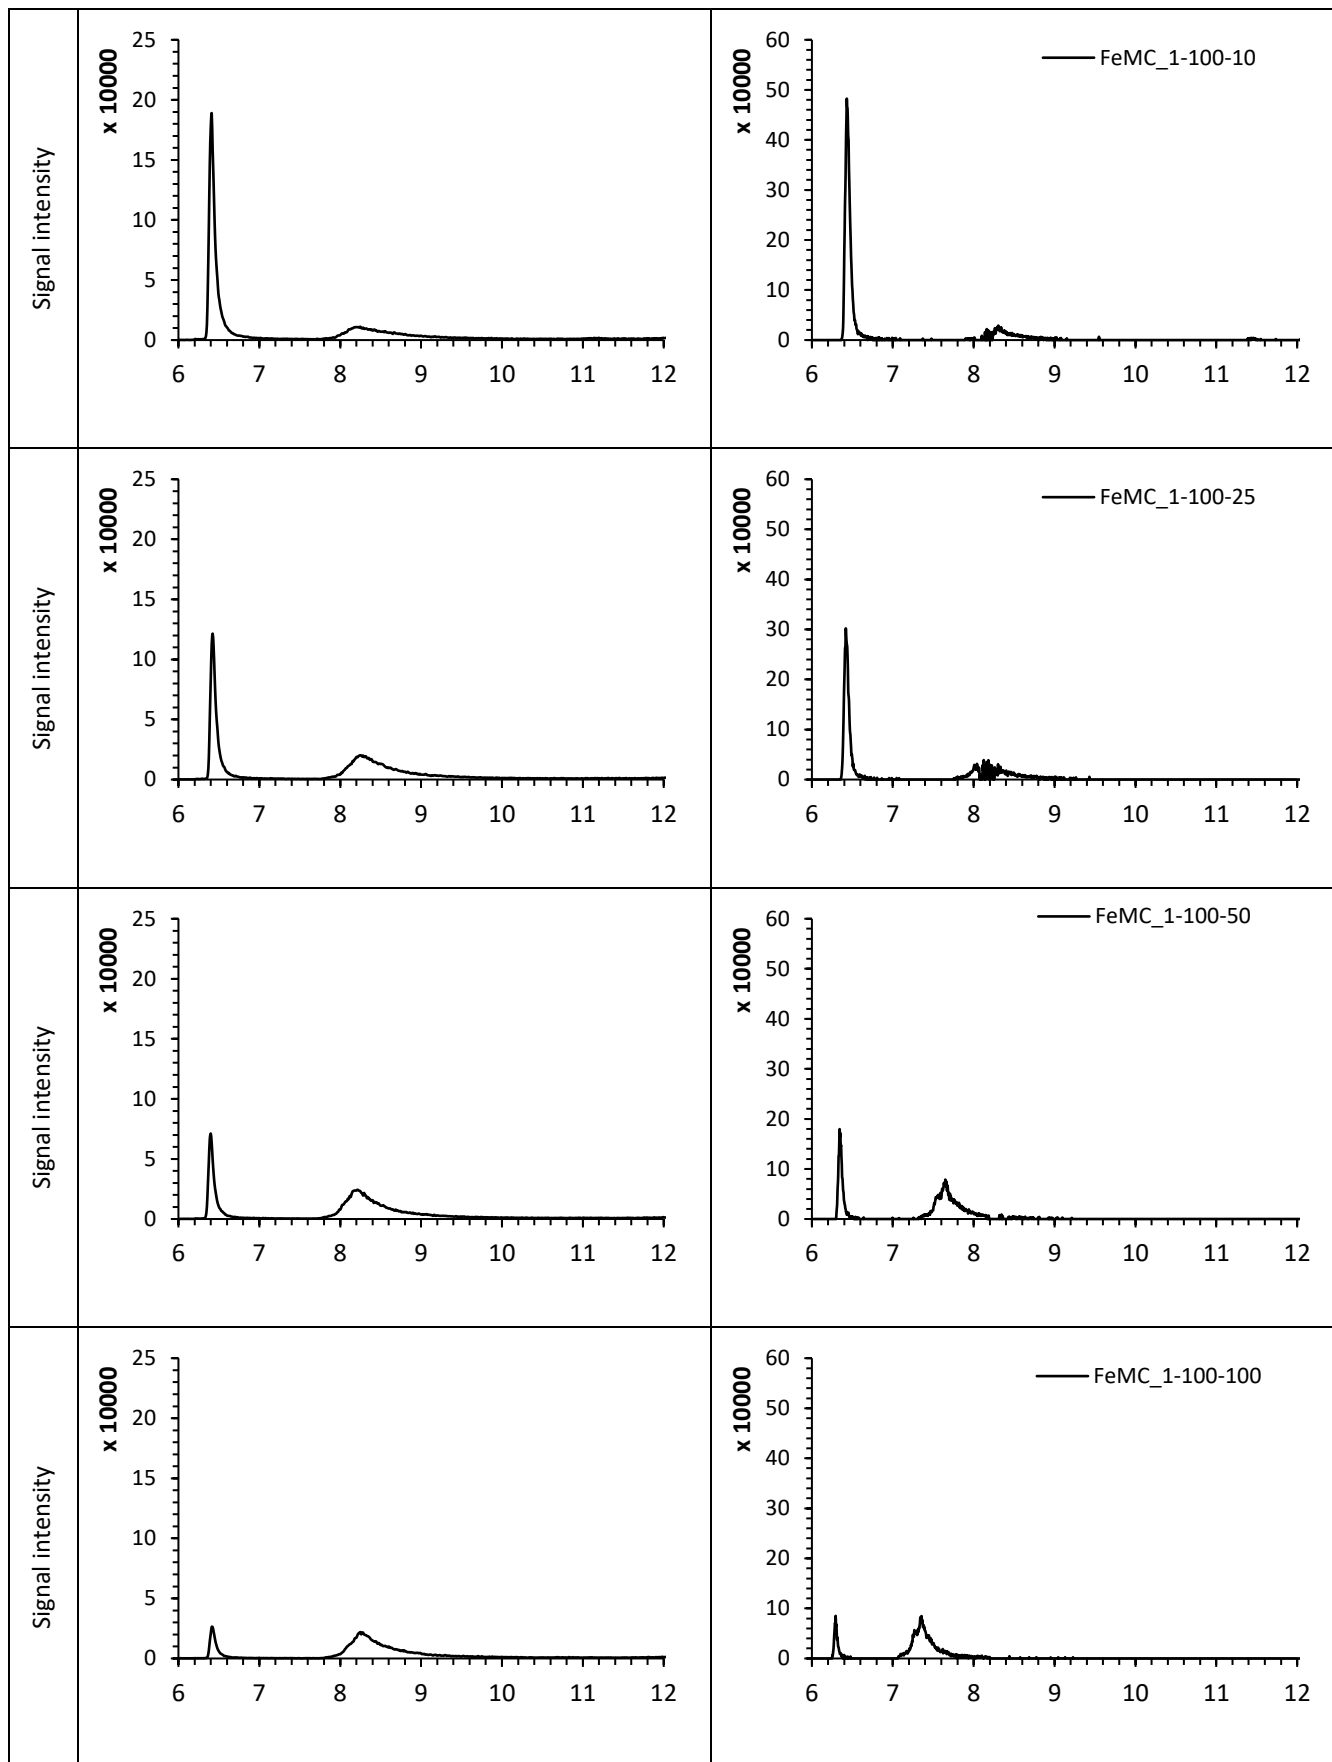

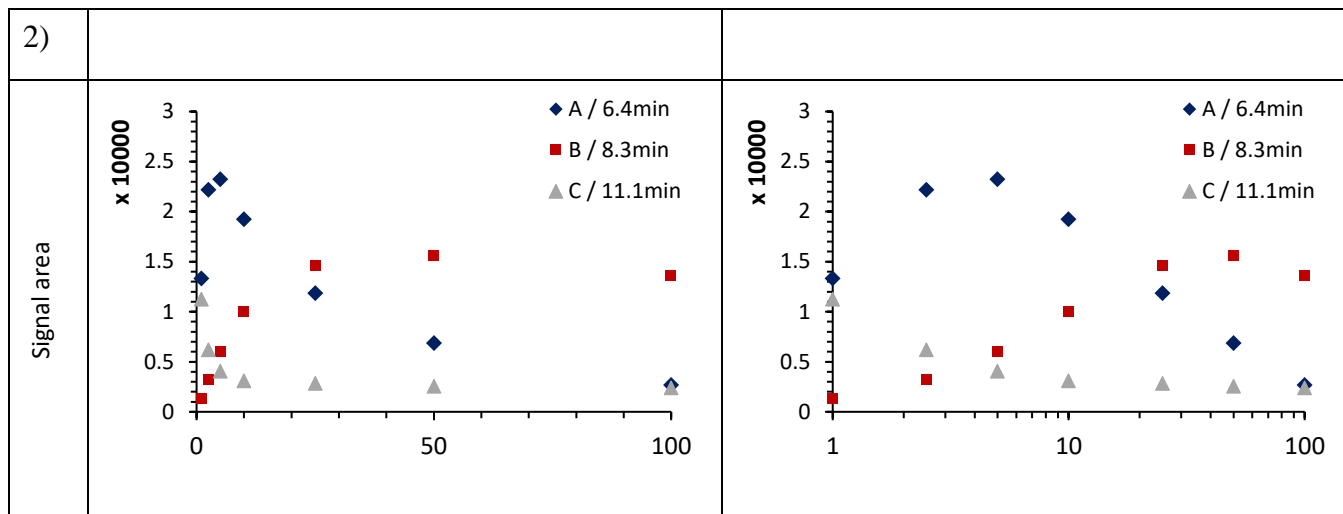

Figure SI-1. 1) Detection of  $^{57}\text{Fe}$  citrate/malate complexes by HILIC – ICP MS (left panels), and ESI MS (combined extracted ion chromatogram of A -  $\text{Fe}_3\text{Cit}_2\text{Mal}_2$ , B -  $\text{Fe}_3\text{Cit}_3\text{Mal}_1$ , C -  $\text{Fe}_3\text{Cit}_1\text{Mal}_3$  ions).  $100 \mu\text{g L}^{-1}$  of  $^{57}\text{Fe}$  added. The Fe/Mal/Cit ratios are given in each of the individual panels. 2) Changes in the morphology of the chromatograms for various Fe: Mal: Cit ratios expressed in the areas of individual peaks as a function of citric acid concentration. Data based on HILIC ICP MS.
